# Supplementary material for: Achieving durable hydrophilic modification of polytetrafluoroethylene (PTFE) through organic/inorganic hybridization strategy
Source: Royal Society of Chemistry journal article supplement (doi:10.1039/d3nj05555h), 2024-01-01
Supplement: d3nj05555h1.pdf [file d3nj05555h1.pdf]

Supplementary Material

**Achieving durable hydrophilic modification of  
polytetrafluoroethylene (PTFE) through organic/inorganic  
hybridization strategy**

Kangjia Ding<sup>a,b</sup>, Lijuan Wei<sup>b,c</sup>, Yangfeng Guo<sup>b,c</sup>, Tingting Zhang<sup>b,c</sup>, Dongfang  
Wang<sup>b,c</sup>, Yiyang Xu<sup>b,\*</sup>, and Qian Li<sup>b,\*</sup>

<sup>a</sup> *School of Materials science & Engineering, Zhengzhou University, Zhengzhou 450001,  
P. R. China*

<sup>b</sup> *National Center for International Research of Micro-Nano Molding Technology,  
Zhengzhou University, Zhengzhou 450001, P. R. China*

<sup>c</sup> *School of Mechanics and safety Engineering, Zhengzhou University, Zhengzhou,  
450001, P. R. China.*

*\*Corresponding authors, E-mail: yiyangxu2020@outlook.com*

*Address: No. 100 Science Avenue, Zhengzhou, Henan 450001, China*

## List of Supplementary Materials

- Table S1. Atom percentage results of PTFE, PTFE-R and PTFE-R-O
- Figure S1. The wide-scan XPS spectra of pristine PTFE.
- Figure S2. The wide-scan XPS spectra of PTFE-R.
- Figure S3. The wide-scan XPS spectra of PTFE-R-O
- Figure S4. High-resolution O1s XPS spectra of PTFE-R.
- Figure S5. WCA of PTFE, PTFE-R and PTFE-R-O
- Figure S6. Photographs of PTFE-R-O (a) and samples after heated in deionized water (b), alkaline solution (c) and acidic solution (d) for 48h.
- Figure S7. AFM images and surface roughness of PTFE (a), PTFE-R (b), PTFE-R-O (c) and PTFE-R-O processed in deionized water (d), alkaline solution (e) and acidic solution (f).
- Figure S8. The pollution resistance performance of PTFE-R-O to different simulated solid waste.

| Atom     | C (%) | O (%) | F (%) | Mn (%) |
|----------|-------|-------|-------|--------|
| PTFE     | 34.5  | 3.7   | 61.8  | /      |
| PTFE-R   | 82.5  | 16.0  | 1.5   | /      |
| PTFE-R-O | 35.6  | 41.4  | 5.1   | 17.8   |

Table S1. Atom percentage results of PTFE, PTFE-R and PTFE-R-O

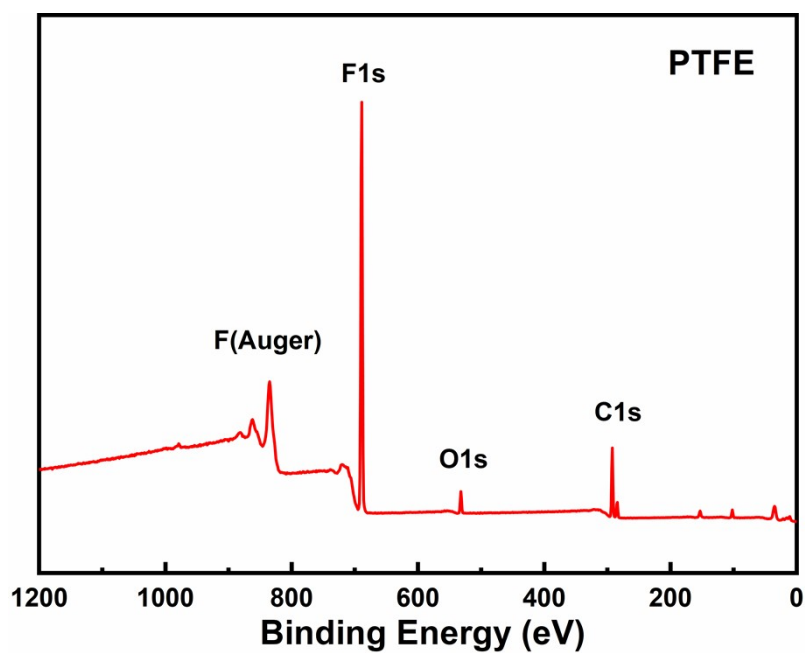

Figure S1. The wide-scan XPS spectra of pristine PTFE

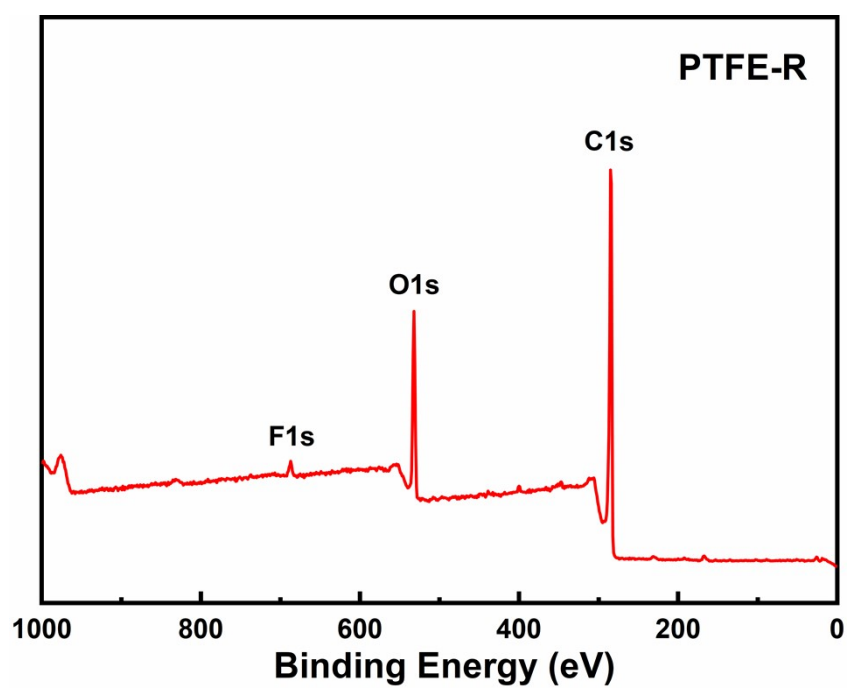

Figure S2. The wide-scan XPS spectra of PTFE-R

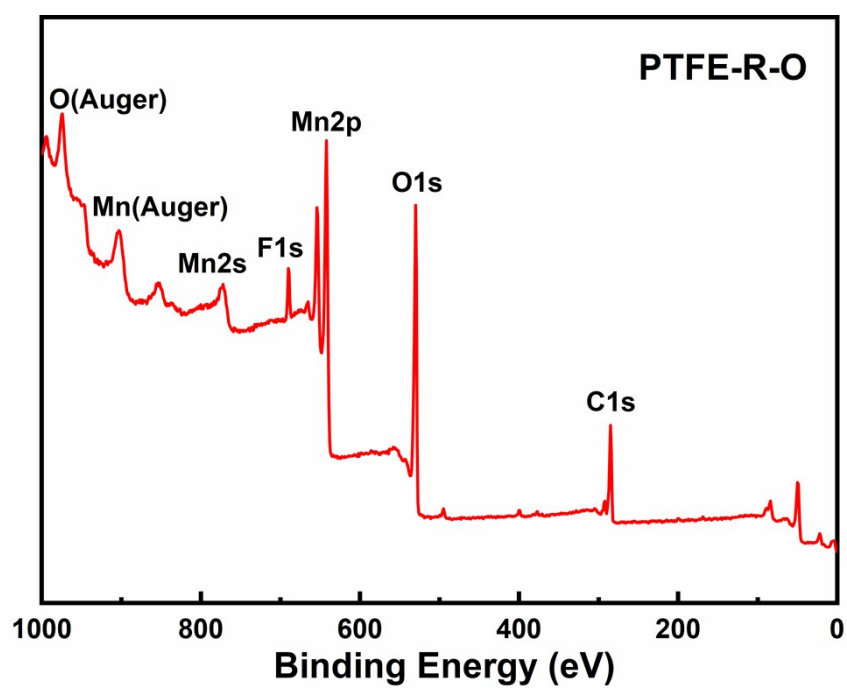

Figure S3. The wide-scan XPS spectra of PTFE-R-O

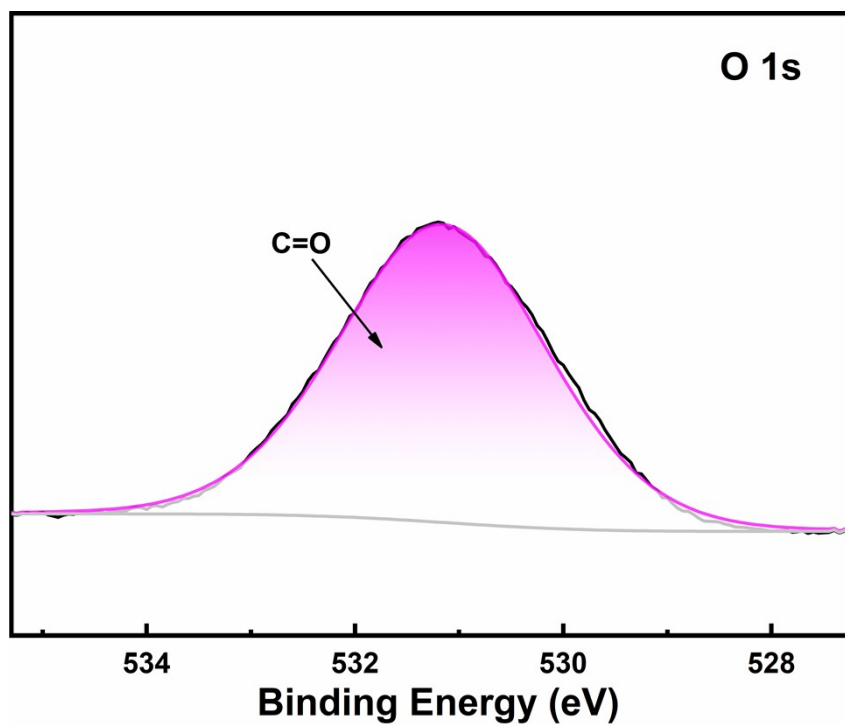

Figure S4. High-resolution O<sub>1s</sub> XPS spectra of PTFE-R.

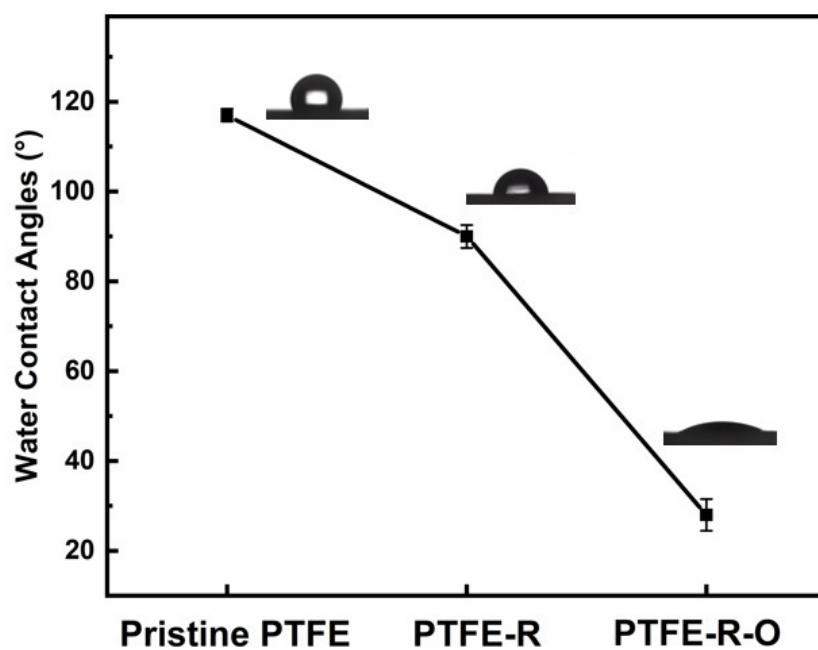

Figure S5. WCA of PTFE, PTFE-R and PTFE-R-O

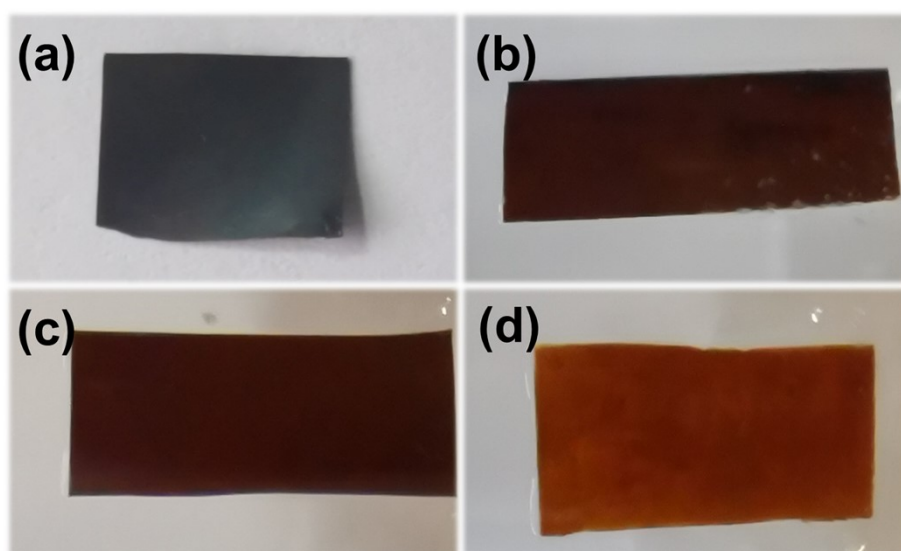

Figure S6. Photographs of PTFE-R-O (a) and samples after heated in deionized water (b), alkaline solution (c) and acidic solution (d) for 48h.

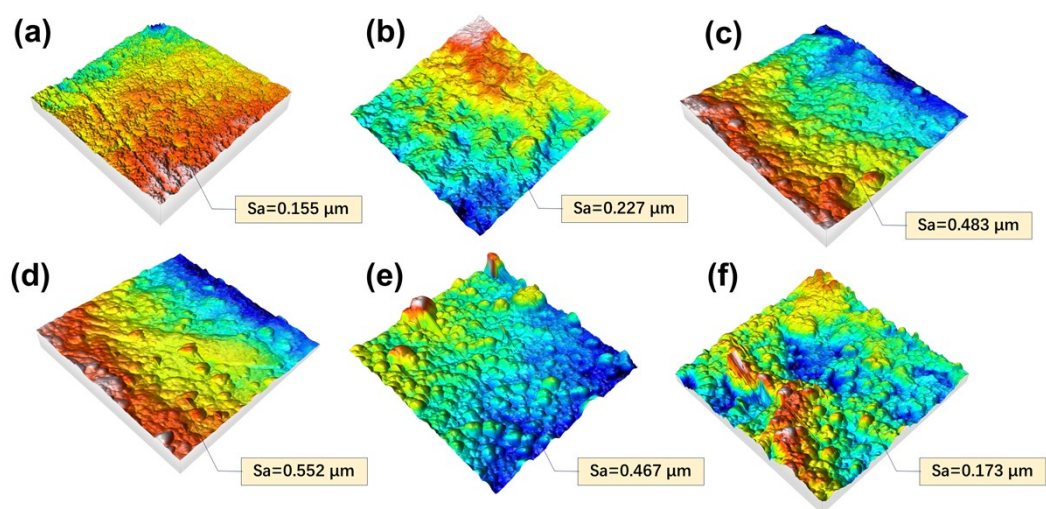

Figure S7. AFM images and surface roughness of PTFE (a), PTFE-R (b), PTFE-R-O (c) and PTFE-R-O processed in deionized water (d), alkaline solution (e) and acidic solution (f).

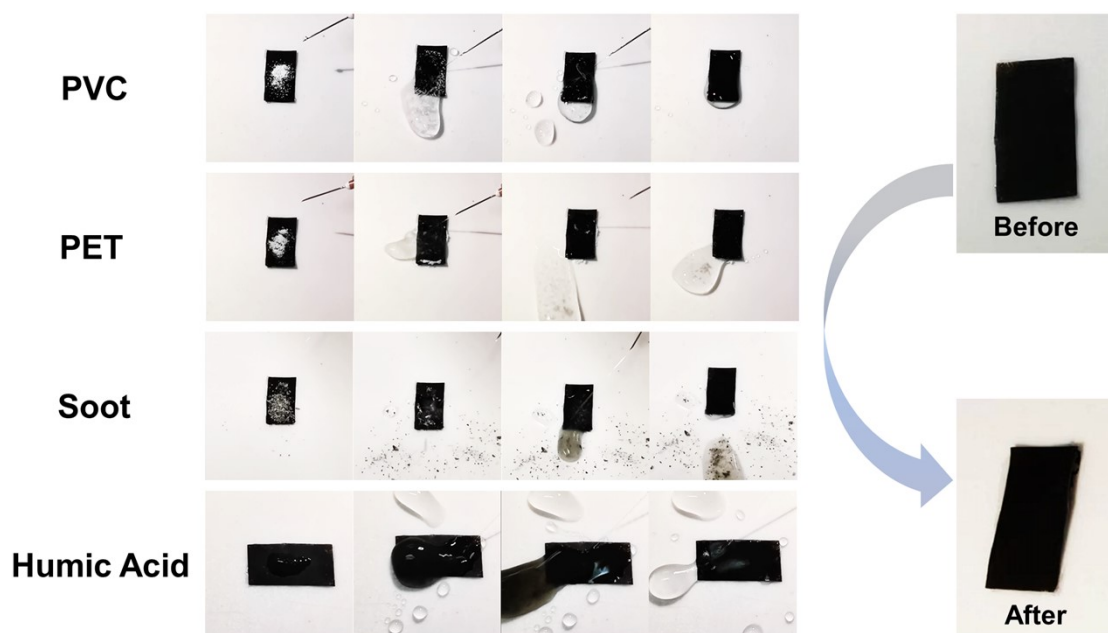

Figure S8. The pollution resistance performance of PTFE-R-O to different simulated solid waste.
